# Supplementary material for: AXR1 affects DNA methylation independently of its role in regulating meiotic crossover localization
Source: PubMed Central journal article supplement (PMC7351236; doi:10.1371/journal.pgen.1008894), 2020-06-29

Sup Figure S8

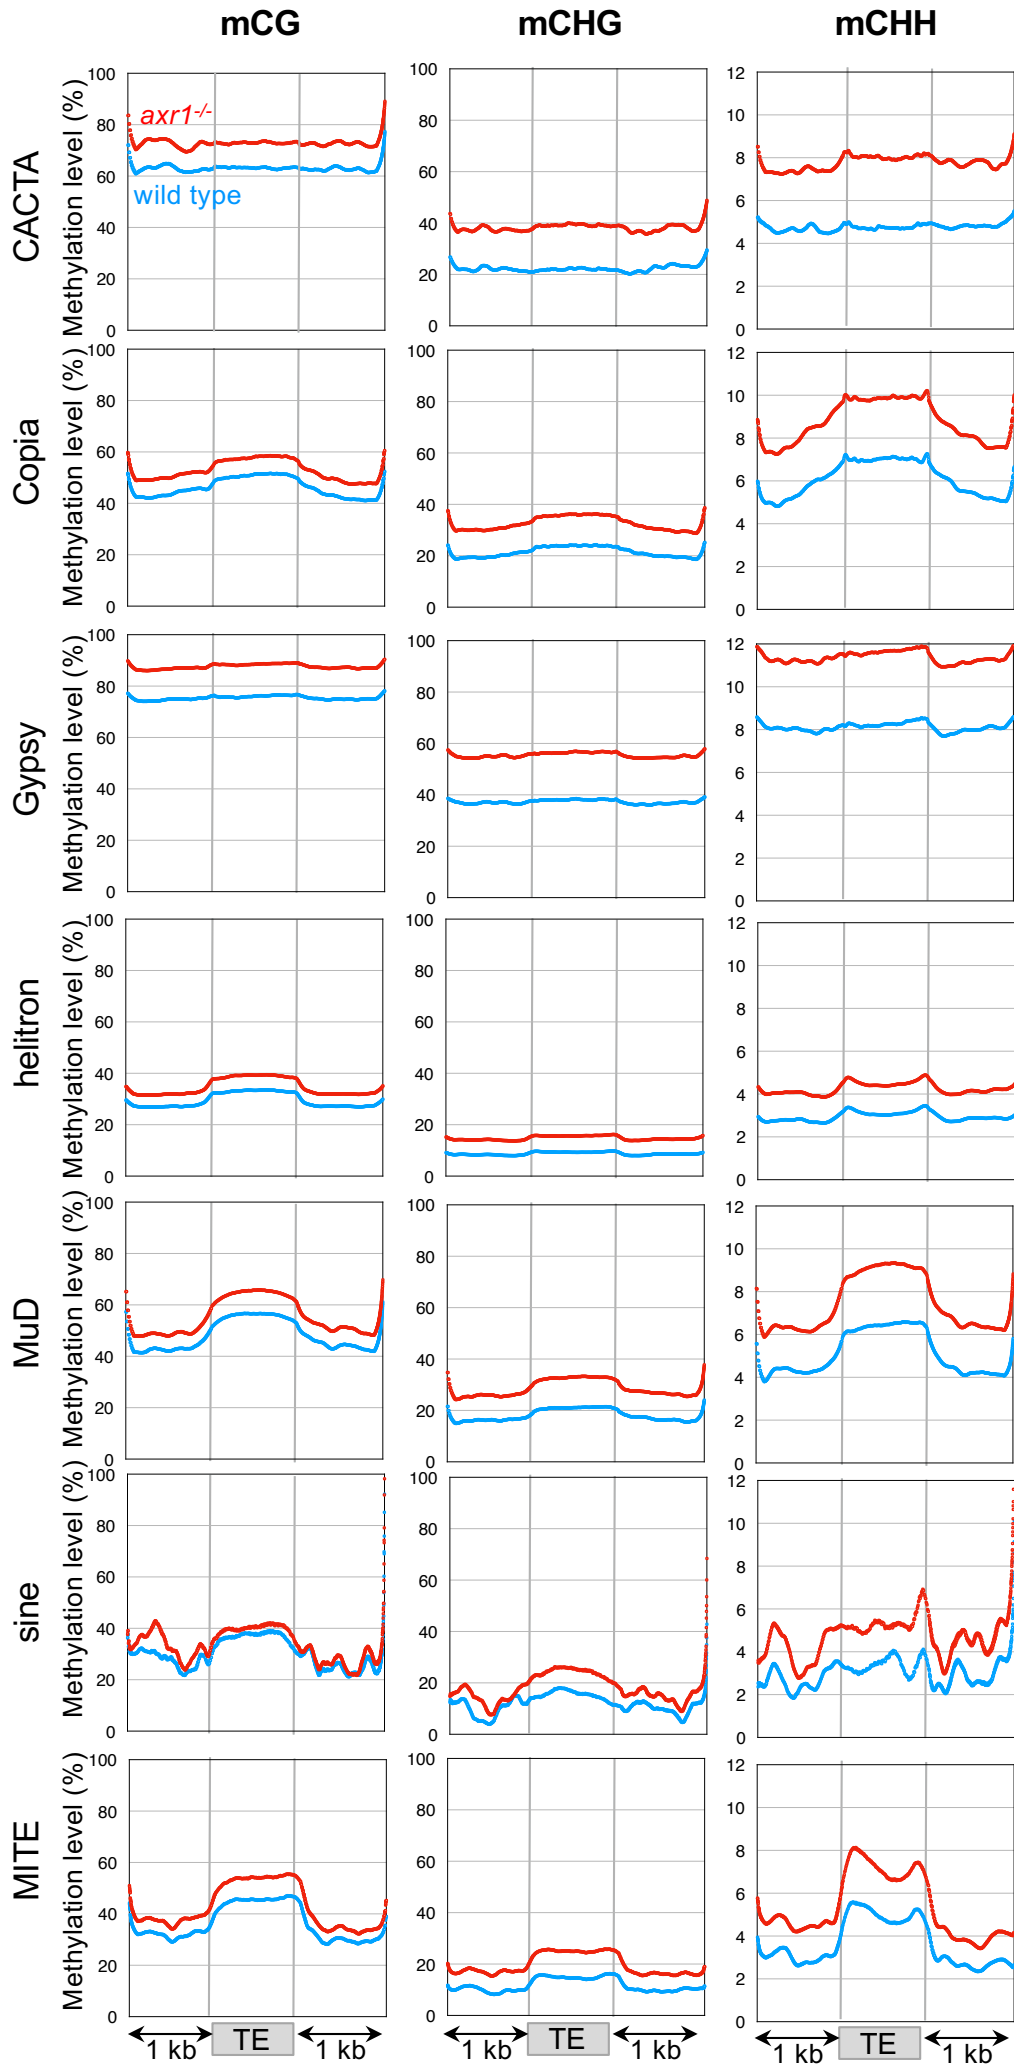

Supplement: pgen.1008894.s008.pdf [file pgen.1008894.s008.pdf]
